# Supplementary material for: A copper complex supported by an N2S-tridentate ligand inducing efficient heterolytic O–O bond cleavage of alkylhydroperoxide
Source: Royal Society of Chemistry journal article supplement (doi:10.1039/c3dt52952e), 2014-01-01
Supplement: c3dt52952e.pdf [file c3dt52952e.pdf]

## Supplementary information

For

**Copper complexes supported by an  $N_2S$ -tridentate ligand inducing efficient heterolytic O–O bond cleavage of alkylperoxide**

**Tetsuro Tano,<sup>a</sup> Kaoru Mieda,<sup>b</sup> Hideki Sugimoto,<sup>a</sup> Takashi Ogura<sup>b</sup> and Shinobu Itoh<sup>\*a</sup>**

<sup>a</sup> *Department of Material and Life Science, Division of Advanced Science and Biotechnology, Graduate School of Engineering, Osaka University, 2-1 Yamada-oka, Suita, Osaka 565-0871, Japan. E-mail: [Shinobu@mls.eng.osaka-u.ac.jp](mailto:Shinobu@mls.eng.osaka-u.ac.jp)*

<sup>b</sup> *Research Institute of Picobiology, Graduate School of Life Science, University of Hyogo, 3-2-1 Kouto, Kamigori-cho, Ako-gun, Hyogo 678-1297, Japan.*

## Synthesis

**[Cu<sup>II</sup>(L<sup>N2S</sup>)(Cl)](BF<sub>4</sub>) (2<sup>N2S</sup>•Cl).** Cu<sup>II</sup>Cl<sub>2</sub> (8.6 mg, 64 μmol) was added to a CH<sub>3</sub>CN solution of L<sup>N2S</sup> (15 mg, 64 μmol). After stirring the solution for 10 min at room temperature, NaBF<sub>4</sub> (7.0 mg, 64 μmol) was added to the solution. Addition of CH<sub>2</sub>Cl<sub>2</sub> (30 mL) to the solution gave a white powder that was removed by filtration. The filtrate was concentrated to give green oily material. Single crystals were obtained for the X-ray analysis by diffusion of *n*-hexane into a CH<sub>2</sub>Cl<sub>2</sub> solution of the green material (73 % yield, 20 mg). FT-IR (KBr) 1084 cm<sup>-1</sup> (BF<sub>4</sub><sup>-</sup>); ESI-MS (pos.) *m/z* = 334.0, calcd for [Cu<sup>II</sup>(L<sup>N2S</sup>)(Cl)]<sup>+</sup> 334.0; Anal. Calcd for [Cu<sup>II</sup>(L<sup>N2S</sup>)(Cl)]BF<sub>4</sub>•0.1H<sub>2</sub>O (C<sub>13</sub>H<sub>20.2</sub>BClCuF<sub>4</sub>N<sub>2</sub>O<sub>0.1</sub>S): C, 36.83; H, 4.80; N, 6.61. Found: C, 36.64; H, 4.76; N, 6.60.

**[Cu<sup>II</sup>(L<sup>N2S</sup>)(N<sub>3</sub>)](BF<sub>4</sub>) (2<sup>N2S</sup>•N<sub>3</sub>).** To a methanol solution of L<sup>N2S</sup> (12 mg, 51 μmol) was added Cu<sup>II</sup>SO<sub>4</sub>•5H<sub>2</sub>O (13 mg, 51 μmol), when the color of solution turned dark blue. After stirring for 5 min, NaN<sub>3</sub> (3.3 mg, 51 μmol) was added to give the green solution. Then, NaBF<sub>4</sub> (5.6 mg, 51 μmol) was added to the solution, and the mixture was stirred for additional 5 min. Insoluble material was then removed by filtration. The filtrate was concentrated to give green oily material. Single crystals were obtained for the X-ray analysis by diffusion of *n*-hexane into a CH<sub>2</sub>Cl<sub>2</sub> solution of the green material (67 % yield, 15 mg). FT-IR (KBr) 2078 cm<sup>-1</sup> (N<sub>3</sub><sup>-</sup>), 1073 cm<sup>-1</sup> (BF<sub>4</sub><sup>-</sup>); ESI-MS (pos.) *m/z* = 299.2, calcd for [Cu<sup>I</sup>(L<sup>N2S</sup>)]<sup>+</sup> 299.1; Anal. Calcd for [Cu<sup>II</sup>(L<sup>N2S</sup>)(N<sub>3</sub>)]BF<sub>4</sub>•0.13H<sub>2</sub>O (C<sub>13</sub>H<sub>20.26</sub>BClCuF<sub>4</sub>N<sub>5</sub>O<sub>0.13</sub>S): C, 36.22; H, 4.74; N, 16.25. Found: C, 35.91; H, 4.75; N, 16.56.

**[Cu<sup>II</sup>(L<sup>N2S</sup>)(NO<sub>2</sub>)(OTf)] (2<sup>N2S</sup>•NO<sub>2</sub>).** To a methanol solution of L<sup>N2S</sup> (6.5 mg, 23 μmol) was added Cu<sup>II</sup>SO<sub>4</sub>•5H<sub>2</sub>O (6.0 mg, 23 μmol), when the color of solution turned dark blue. After stirring for 5 min, NaNO<sub>2</sub> (1.6 mg, 23 μmol) was added to give the green solution. Then, NaOTf (4.0 mg, 23 μmol) was added to the solution, and the mixture was stirred for additional 5 min. Insoluble material was then removed by filtration, and the filtrate was concentrated to give green oily material. Single crystals were obtained for the X-ray analysis by diffusion of *n*-hexane into a CH<sub>2</sub>Cl<sub>2</sub> solution of the green material (43 % yield, 5.0 mg). FT-IR (KBr) 1477 cm<sup>-1</sup> (NO<sub>2</sub><sup>-</sup>), 1248, 1158 and 1030 cm<sup>-1</sup> (OTf<sup>-</sup>); ESI-MS (pos.) *m/z* =

448.2, calcd for  $[\text{Cu}^{\text{II}}(\text{L}^{\text{N}2\text{S}})(\text{OTf})]^+$  448.0; Anal. Calcd for  $\text{Cu}^{\text{II}}(\text{L}^{\text{N}2\text{S}})(\text{NO}_2)(\text{OTf}) \cdot 0.5\text{H}_2\text{O}$   
( $\text{C}_{14}\text{H}_{21}\text{ClCuF}_3\text{N}_3\text{O}_{5.5}\text{S}_2$ ): C, 33.36; H, 4.20; N, 8.34. Found: C, 33.24; H, 3.96; N, 8.30.

**Table S1.** X-ray Crystallographic Data of Copper(I) Complexes **1<sup>N2S</sup>**.

| Compound                                       | <b>1<sup>N2S</sup></b>                                             |
|------------------------------------------------|--------------------------------------------------------------------|
| formula                                        | C <sub>13</sub> H <sub>20</sub> CuF <sub>6</sub> N <sub>2</sub> PS |
| formula weight                                 | 444.88                                                             |
| crystal system                                 | monoclinic                                                         |
| space group                                    | <i>P</i> 2 <sub>1</sub> /n (#14)                                   |
| <i>a</i> , Å                                   | 9.0976(3)                                                          |
| <i>b</i> , Å                                   | 15.0804(6)                                                         |
| <i>c</i> , Å                                   | 12.5185(5)                                                         |
| <i>α</i> , deg                                 | 90                                                                 |
| <i>β</i> , deg                                 | 105.9955(9)                                                        |
| <i>γ</i> , deg                                 | 90                                                                 |
| <i>V</i> , Å <sup>3</sup>                      | 1650.6(1)                                                          |
| <i>Z</i>                                       | 4                                                                  |
| <i>F</i> (000)                                 | 904.00                                                             |
| <i>D</i> <sub>calcd</sub> , g/cm <sup>-3</sup> | 1.790                                                              |
| <i>T</i> , K                                   | 103                                                                |
| crystal size, mm                               | 0.500 x 0.400 x 0.400                                              |
| <i>μ</i> (MoKα), cm <sup>-1</sup>              | 16.071                                                             |
| 2 <i>θ</i> <sub>max</sub> , deg                | 54.9                                                               |
| no. of reflns measd                            | 3774                                                               |
| no. of reflns obsd                             | 3774 (All reflections)                                             |
| no. of variables                               | 217                                                                |
| <i>R</i> 1 <sup>a</sup>                        | 0.0302                                                             |
| <i>wR</i> 2 <sup>b</sup>                       | 0.1122                                                             |
| GOF                                            | 1.031                                                              |

<sup>a</sup> *RI* =  $\sum ||F_o| - |F_c|| / \sum |F_o|$ .      <sup>b</sup> *wR2* =  $[\sum w (|F_o|^2 - |F_c|^2)^2 / \sum w (F_o^2)^2]^{1/2}$

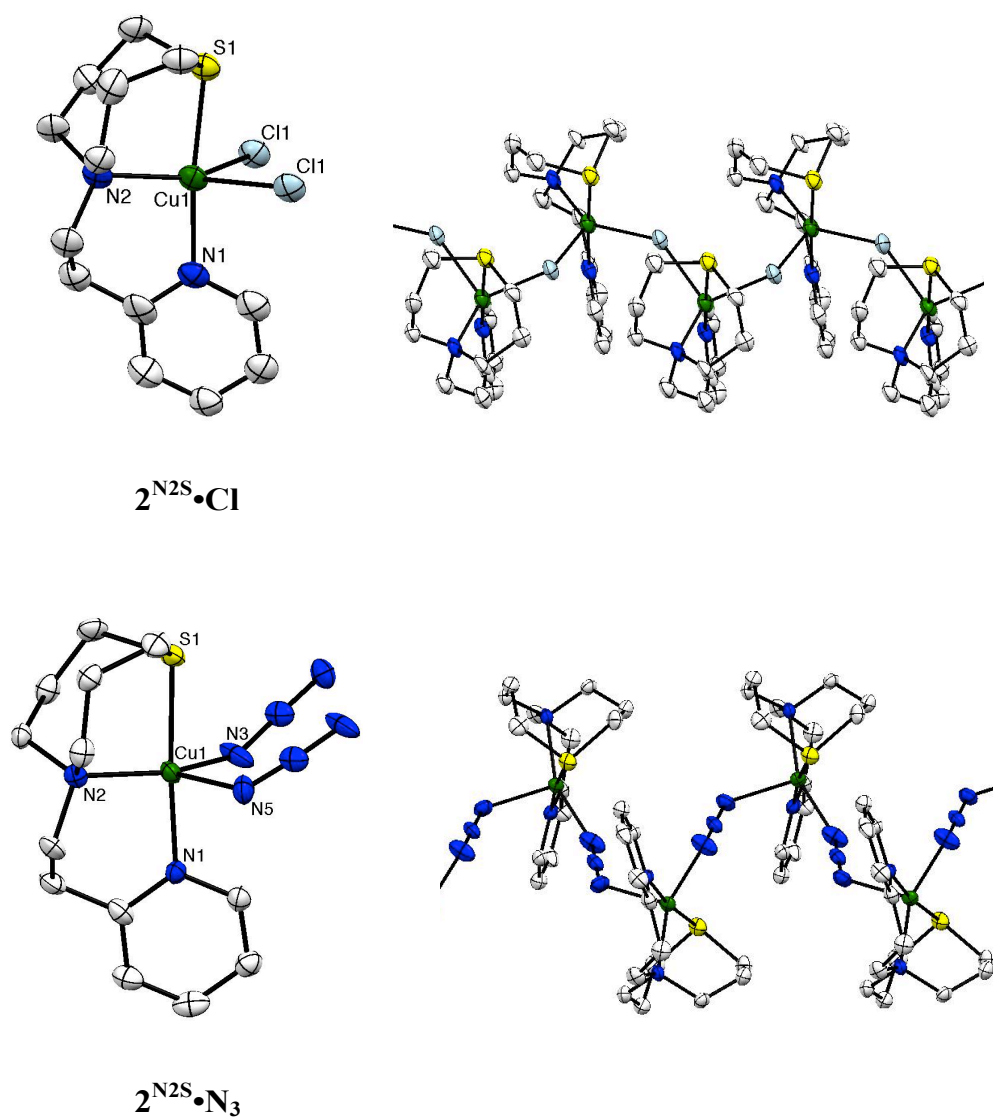

**Fig. S1** ORTEP drawings of  $2^{N_2S} \cdot Cl$  and  $2^{N_2S} \cdot N_3$  (left) and their linear chain structures (right) showing 50 % probability thermal ellipsoids. Counter anion ( $BF_4^-$ ) and hydrogen atoms are omitted for clarity.

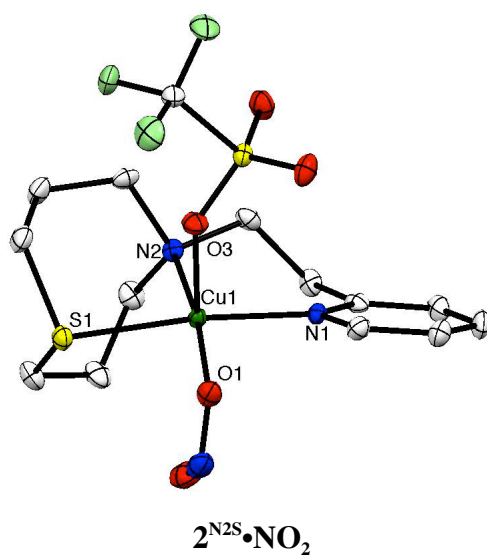

**Fig. S2** ORTEP drawings of  $2^{N2S} \cdot NO_2$  showing 50 % probability thermal ellipsoids. Hydrogen atoms are omitted for clarity.

**Table S2.** X-ray Crystallographic Data of Copper(II) Complexes **2<sup>N2S</sup>•Cl**, **2<sup>N2S</sup>•N<sub>3</sub>**, **2<sup>N2S</sup>•NO<sub>2</sub>** and **2<sup>N2S</sup>•OTf**.

| Compound                                       | <b>2<sup>N2S</sup>•Cl</b>                                            | <b>2<sup>N2S</sup>•N<sub>3</sub></b>                                                                         |
|------------------------------------------------|----------------------------------------------------------------------|--------------------------------------------------------------------------------------------------------------|
| formula                                        | C <sub>13</sub> H <sub>20</sub> BClCuF <sub>4</sub> N <sub>2</sub> S | C <sub>26</sub> H <sub>40</sub> B <sub>2</sub> Cu <sub>2</sub> F <sub>8</sub> N <sub>10</sub> S <sub>2</sub> |
| formula weight                                 | 422.18                                                               | 857.49                                                                                                       |
| crystal system                                 | monoclinic                                                           | monoclinic                                                                                                   |
| space group                                    | <i>P</i> 2 <sub>1</sub> / <i>c</i> (#14)                             | <i>P</i> 2 <sub>1</sub> / <i>n</i> (#14)                                                                     |
| <i>a</i> , Å                                   | 10.430(2)                                                            | 19.271(2)                                                                                                    |
| <i>b</i> , Å                                   | 22.179(5)                                                            | 7.1058(4)                                                                                                    |
| <i>c</i> , Å                                   | 7.084(2)                                                             | 25.114(2)                                                                                                    |
| <i>α</i> , deg                                 | 90                                                                   | 90                                                                                                           |
| <i>β</i> , deg                                 | 92.797(3)                                                            | 103.692(2)                                                                                                   |
| <i>γ</i> , deg                                 | 90                                                                   | 90                                                                                                           |
| <i>V</i> , Å <sup>3</sup>                      | 1636.6(5)                                                            | 3341.2(4)                                                                                                    |
| <i>Z</i>                                       | 4                                                                    | 4                                                                                                            |
| <i>F</i> (000)                                 | 860.00                                                               | 1752.00                                                                                                      |
| <i>D</i> <sub>calcd</sub> , g/cm <sup>-3</sup> | 1.713                                                                | 1.704                                                                                                        |
| <i>T</i> , K                                   | 103                                                                  | 103                                                                                                          |
| crystal size, mm                               | 0.600 x 0.200 x 0.100                                                | 0.400 x 0.400 x 0.100                                                                                        |
| <i>μ</i> (MoKα), cm <sup>-1</sup>              | 16.627                                                               | 14.808                                                                                                       |
| 2 <i>θ</i> <sub>max</sub> , deg                | 55.0                                                                 | 55.0                                                                                                         |
| no. of reflns measd                            | 15561                                                                | 31522                                                                                                        |
| no. of reflns obsd                             | 3744 (All reflections)                                               | 7660 (All reflections)                                                                                       |
| no. of variables                               | 228                                                                  | 491                                                                                                          |
| <i>RI</i> <sup>a</sup>                         | 0.1626                                                               | 0.0561                                                                                                       |
| <i>wR2</i> <sup>b</sup>                        | 0.4008                                                               | 0.1528                                                                                                       |
| GOF                                            | 1.000                                                                | 1.142                                                                                                        |

$$^a RI = \sum ||F_o| - |F_c|| / \sum |F_o|. \quad ^b wR2 = [\sum w (|F_o|^2 - |F_c|^2)^2 / \sum w (F_o^2)^2]^{1/2}$$

**Table S2.** X-ray Crystallographic Data of Copper(II) Complexes **2<sup>N2S</sup>•Cl**, **2<sup>N2S</sup>•N<sub>3</sub>**, **2<sup>N2S</sup>•NO<sub>2</sub>** and **2<sup>N2S</sup>•OTf** (continued).

| Compound                                       | <b>2<sup>N2S</sup>•NO<sub>2</sub></b>                                                         | <b>2<sup>N2S</sup>•OTf</b>                                                                    |
|------------------------------------------------|-----------------------------------------------------------------------------------------------|-----------------------------------------------------------------------------------------------|
| formula                                        | C <sub>14</sub> H <sub>22</sub> CuF <sub>3</sub> N <sub>3</sub> O <sub>6</sub> S <sub>2</sub> | C <sub>15</sub> H <sub>20</sub> CuF <sub>8</sub> N <sub>2</sub> O <sub>6</sub> S <sub>3</sub> |
| formula weight                                 | 513.01                                                                                        | 598.05                                                                                        |
| crystal system                                 | triclinic                                                                                     | monoclinic                                                                                    |
| space group                                    | <i>P</i> -1 (#2)                                                                              | <i>P</i> 2 <sub>1</sub> /c (#14)                                                              |
| <i>a</i> , Å                                   | 7.6907(4)                                                                                     | 7.172(2)                                                                                      |
| <i>b</i> , Å                                   | 8.7410(5)                                                                                     | 20.845(4)                                                                                     |
| <i>c</i> , Å                                   | 15.2512(7)                                                                                    | 15.117(3)                                                                                     |
| <i>α</i> , deg                                 | 84.088(2)                                                                                     | 90                                                                                            |
| <i>β</i> , deg                                 | 78.235(2)                                                                                     | 103.769(4)                                                                                    |
| <i>γ</i> , deg                                 | 74.662(2)                                                                                     | 90                                                                                            |
| <i>V</i> , Å <sup>3</sup>                      | 966.66(8)                                                                                     | 2195.0(7)                                                                                     |
| <i>Z</i>                                       | 2                                                                                             | 4                                                                                             |
| <i>F</i> (000)                                 | 526.00                                                                                        | 1212.00                                                                                       |
| <i>D</i> <sub>calcd</sub> , g/cm <sup>-3</sup> | 1.713                                                                                         | 1.810                                                                                         |
| <i>T</i> , K                                   | 103                                                                                           | 103                                                                                           |
| crystal size, mm                               | 0.400 x 0.300 x 0.100                                                                         | 0.500 x 0.200 x 0.200                                                                         |
| <i>μ</i> (MoKα), cm <sup>-1</sup>              | 14.124                                                                                        | 13.673                                                                                        |
| 2 <i>θ</i> <sub>max</sub> , deg                | 54.9                                                                                          | 55.0                                                                                          |
| no. of reflns measd                            | 9398                                                                                          | 21107                                                                                         |
| no. of reflns obsd                             | 4363 (All reflections)                                                                        | 5020 (All reflections)                                                                        |
| no. of variables                               | 262                                                                                           | 298                                                                                           |
| <i>RI</i> <sup>a</sup>                         | 0.0377                                                                                        | 0.0749                                                                                        |
| <i>wR2</i> <sup>b</sup>                        | 0.1430                                                                                        | 0.2053                                                                                        |
| GOF                                            | 1.188                                                                                         | 1.083                                                                                         |

$$^a RI = \sum ||F_o| - |F_c|| / \sum |F_o|. \quad ^b wR2 = [\sum w (|F_o|^2 - |F_c|^2)^2 / \sum w (F_o^2)^2]^{1/2}$$



**Table 2.** Selected Bond Lengths (Å) and Angles (deg) of  $2^{N_2S} \cdot Cl$ ,  $2^{N_2S} \cdot N_3$ , and  $2^{N_2S} \cdot NO_2$ .

| $2^{N_2S} \cdot Cl$   |            |                   |            |
|-----------------------|------------|-------------------|------------|
| Cu(1)–Cl(1)           | 2.388(3)   | Cu(1)–Cl(1)*      | 2.572(3)   |
| Cu(1)–S(1)            | 2.310(3)   | Cu(1)–N(1)        | 2.016(8)   |
| Cu(1)–N(2)            | 2.068(8)   |                   |            |
| Cl(1)–Cu(1)–Cl(1)*    | 98.50(9)   | Cl(1)–Cu(1)–S(1)  | 85.52(9)   |
| Cl(1)–Cu(1)–N(1)      | 90.0(3)    | Cl(1)–Cu(1)–N(2)  | 140.2(3)   |
| Cl(1)*–Cu(1)–S(1)     | 81.65(9)   | Cl(1)*–Cu(1)–N(1) | 94.3(3)    |
| Cl(1)*–Cu(1)–N(2)     | 119.9(3)   | S(1)–Cu(1)–N(1)   | 173.4(3)   |
| S(1)–Cu(1)–N(2)       | 89.6(3)    | N(1)–Cu(1)–N(2)   | 96.9(3)    |
| $2^{N_2S} \cdot N_3$  |            |                   |            |
| Cu(1)–S(1)            | 2.3306(13) | Cu(1)–N(1)        | 2.036(4)   |
| Cu(1)–N(2)            | 2.078(4)   | Cu(1)–N(5)*       | 2.265(4)   |
| Cu(1)–N(3)            | 2.029(4)   |                   |            |
| S(1)–Cu(1)–N(1)       | 173.24(10) | S(1)–Cu(1)–N(2)   | 88.85(11)  |
| S(1)–Cu(1)–N(5)*      | 91.71(11)  | S(1)–Cu(1)–N(3)   | 86.51(13)  |
| N(1)–Cu(1)–N(2)       | 96.98(14)  | N(1)–Cu(1)–N(5)*  | 90.39(14)  |
| N(1)–Cu(1)–N(3)       | 86.78(15)  | N(2)–Cu(1)–N(5)*  | 102.36(13) |
| N(2)–Cu(1)–N(3)       | 155.92(15) | N(5)*–Cu(1)–N(3)  | 101.39(15) |
| $2^{N_2S} \cdot NO_2$ |            |                   |            |
| Cu(1)–S(1)            | 2.3343(10) | Cu(1)–O(1)        | 2.012(2)   |
| Cu(1)–N(1)            | 2.037(3)   | Cu(1)–N(2)        | 2.076(3)   |
| Cu(1)–O(5)            | 2.343(3)   |                   |            |
| S(1)–Cu(1)–O(1)       | 85.01(8)   | S(1)–Cu(1)–N(1)   | 172.73(7)  |
| S(1)–Cu(1)–N(2)       | 89.03(8)   | S(1)–Cu(1)–O(3)   | 89.65(10)  |
| O(1)–Cu(1)–N(2)       | 92.05(15)  | O(3)–Cu(1)–N(2)   | 102.01(13) |
| O(1)–Cu(1)–N(1)       | 88.17(10)  | N(1)–Cu(1)–N(2)   | 97.52(10)  |

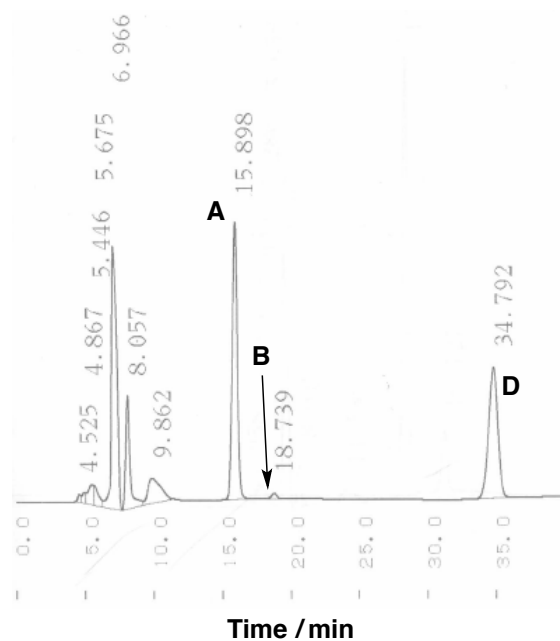

**Fig. S3** HPLC diagram of the organic products derived from the reaction of  $1^{N2S}$  (0.5 mM) and cumene hydroperoxide (CmOOH, 0.5 mM). **Peak A**: cumyl alcohol (CmOH); **Peak B**: acetophenone (PhC(O)Me); **Peak D**: anisole (internal standard).

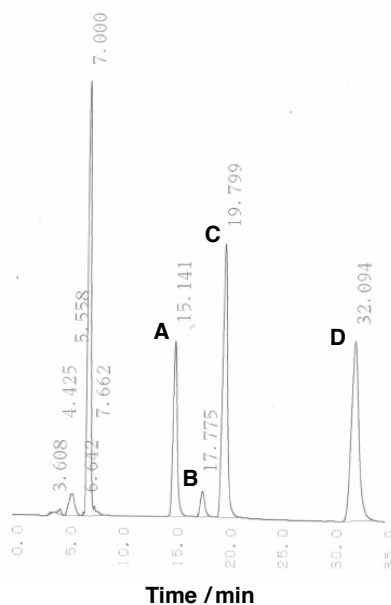

**Fig. S4** HPLC diagram of the organic products derived from the reaction of  $1^{N3}$  (0.5 mM) and cumene hydroperoxide (CmOOH, 0.5 mM). **Peak A**: cumyl alcohol (CmOH); **Peak B**: acetophenone (PhC(O)Me); **Peak C**: CmOOH; **Peak D**: anisole (internal standard).

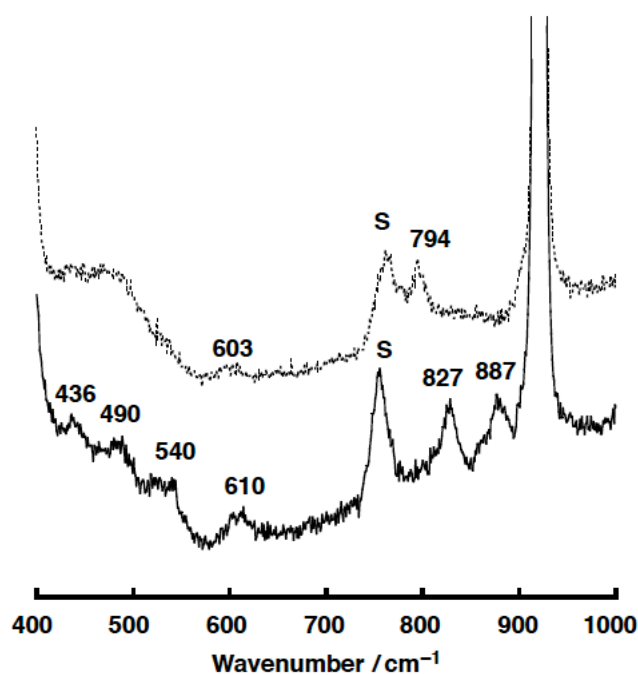

**Fig. S5** Resonance Raman spectra of the intermediate derived from the reaction of  $1^{N2S}$  (3.0 mM) with CmOOH (3.0 mM) generated by using Cm $^{16}$ O $_2$ H (solid line, below) and Cm $^{18}$ O $_2$ H (dotted line, above) obtained with  $\lambda_{max} = 441.6$  nm in CH $_3$ CN at  $-40^\circ\text{C}$ ; s denotes the solvent band.

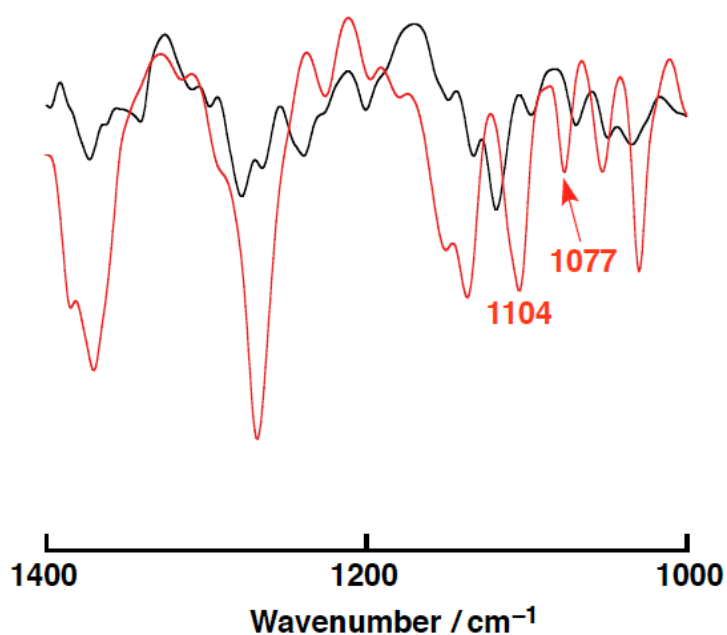

**Fig. S6** IR spectra of ligand oxidation product L $^{N2SO}$  (red line) and L $^{N2S}$  (black line).

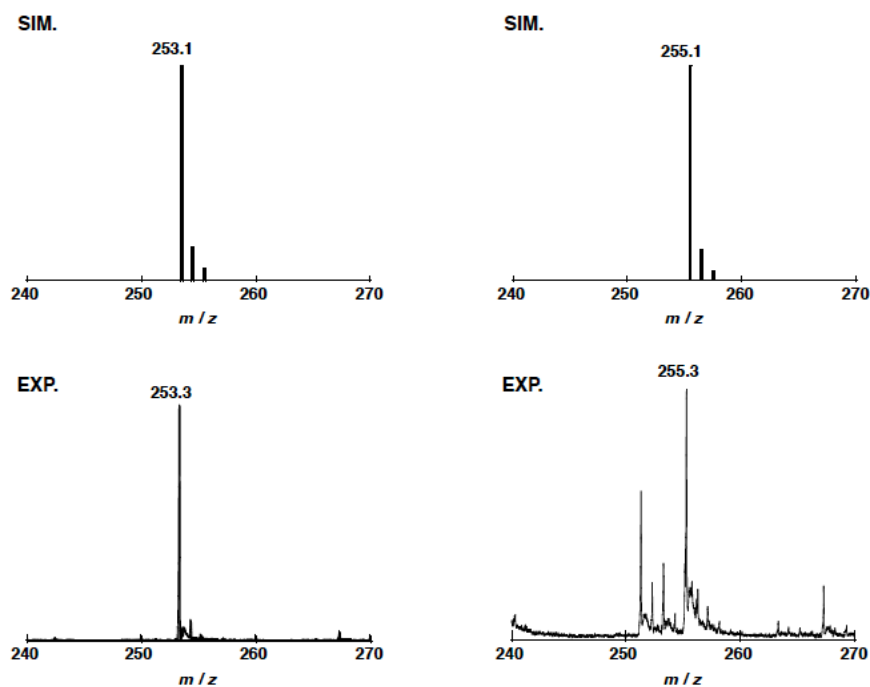

**Fig. S7** Experimental (bottom) and simulated (top) peak envelopes in the positive-ion ESI-MS spectra of the ligand oxidation product derived from the reaction mixture of  $1^{N2S}$  and CmOOH in acetone. (left) with Cm $^{16}$ O $_2$ H and (right) with Cm $^{18}$ O $_2$ H.

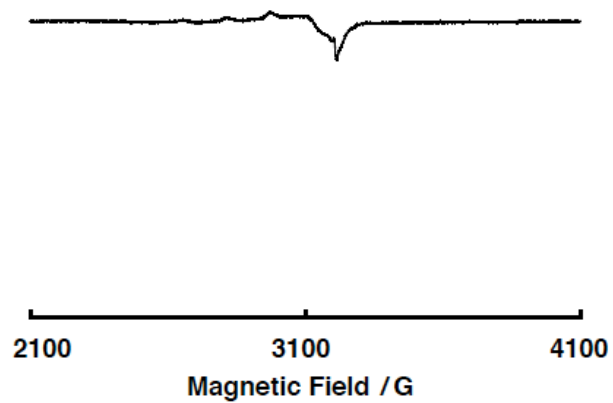

**Fig. S8** The EPR spectrum of the final reaction mixture of **1**<sup>N2S</sup> (0.5 mM) with an equimolar amount of CmOOH in acetone (after warming up to 30 °C). A small amount of copper(II) byproduct (9 % based on the starting copper complex) is involved.
